# Supplementary material for: Aqueous- and vapor-phase detection of nitroaromatic explosives by a water-stable fluorescent microporous MOF directed by an ionic liquid
Source: Royal Society of Chemistry journal article supplement (doi:10.1039/c5ta00322a), 2015-01-01
Supplement: c5ta00322a1.pdf [file c5ta00322a1.pdf]

## **Aqueous- and vapor-phase detection of nitroaromatic explosives by a water-stable fluorescent microporous MOF directed by ionic liquid**

**Jianhua Qin,<sup>a,b</sup> Bing Ma,<sup>a</sup> Xiao-Fei Liu,<sup>a</sup> Hong-Lin Lu,<sup>a</sup> Xi-Yan Dong,<sup>a</sup> Shuang-Quan Zang<sup>\*a</sup> and Hongwei Hou<sup>\*a</sup>**

<sup>a</sup> *College of Chemistry and Molecular Engineering, Zhengzhou University, Zhengzhou 450001, China.*

<sup>b</sup> *College of Chemistry and Chemical Engineering, Luoyang Normal University, Luoyang 471022, China.*

Author for correspondence:

Prof. S.-Q. Zang, E-mail: zangsqzg@zzu.edu.cn;

Prof. H.-W. Hou, E-mail: houghongw@zzu.edu.cn.

## Supporting Information

**Fig. S1-S5** Supporting Structure Figures.

**Fig. S6** Thermogravimetric curve of **1** and **1'**.

**Fig. S7** Solid-state excitation and emission spectra for H<sub>2</sub>L and **1'**.

**Fig. S8-S15** Details of detecting of nitroaromatic explosives in the aqueous phase.

**Fig. S16-S23** Details of detecting of nitroaromatic explosives in the vapor phase.

**Fig. S24** The band like diffuse reflectance spectrum of a solid sample of **1'**.

**Fig. S25** The absorption spectrum of the selected analytes in water.

**Fig. S26** IR spectrum of **1** and **1'**.

**Fig. S27** IR spectrum of **1'** obtained after immersing in 1 mM or saturated aqueous solutions of the selected analytes for three days.

**Fig. S28** Thermogravimetric curve of **1'** obtained after immersing in 1 mM or saturated aqueous solutions of the selected analytes for three days.

**Table S1.** Crystallographic data and structure refinement detail for complex **1**.

**Table S2.** Selected bond lengths (Å) and angles (°) for complex **1**.

**Table S3.** Saturated Vapor Pressure for each of the analytes at room temperature (25 °C).

**Table S4.** Approximate sizes of selected analytes.

**Table S5.** HOMO and LUMO energies calculated for H<sub>2</sub>L and nitroaromatic explosives at B3LYP/6-31G\*\* level of theory.

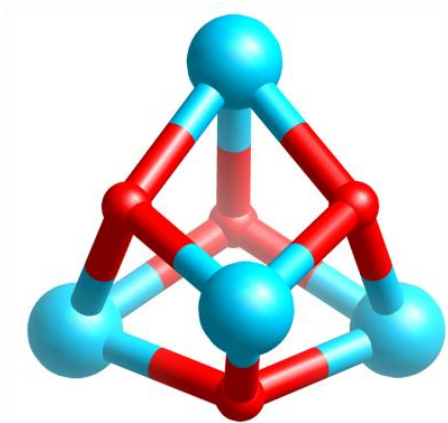

**Fig. S1** View of the cubane-shaped tetranuclear  $[\text{Tb}_4(\mu_3\text{-OH})_4]^{8+}$  cluster.

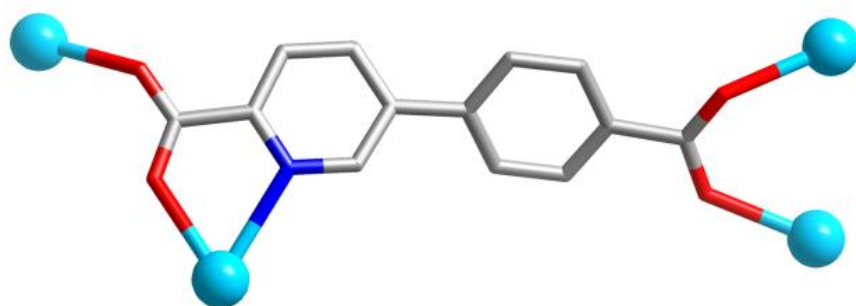

**Fig. S2** Coordination mode of L ligand.

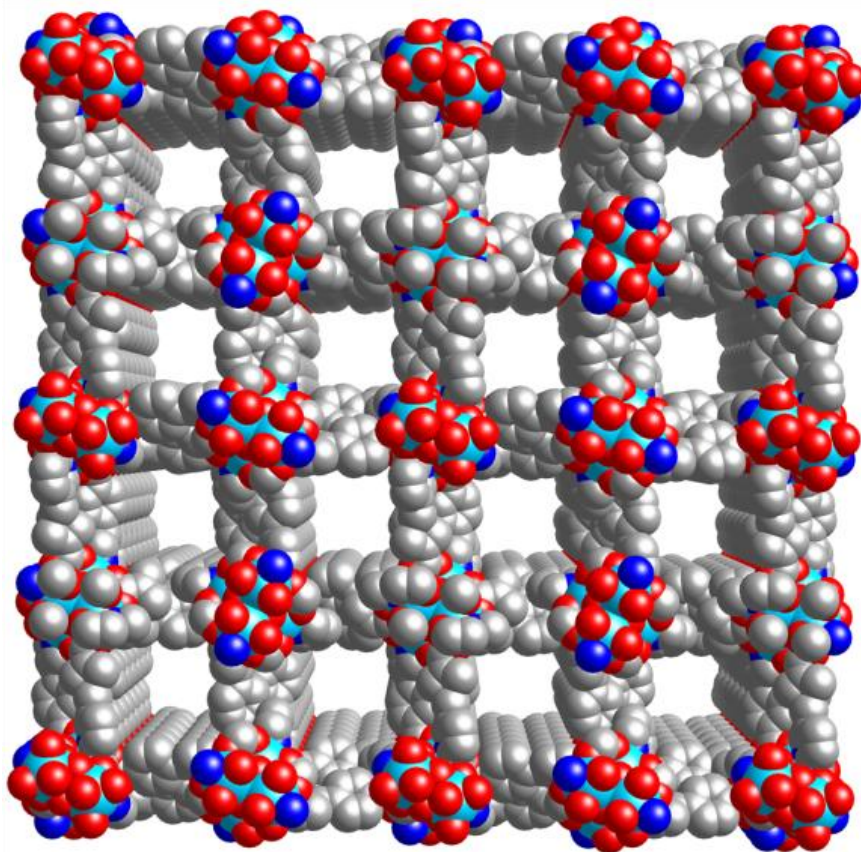

**Fig. S3** Space-filling model to show the channels along the *c*-axis direction.

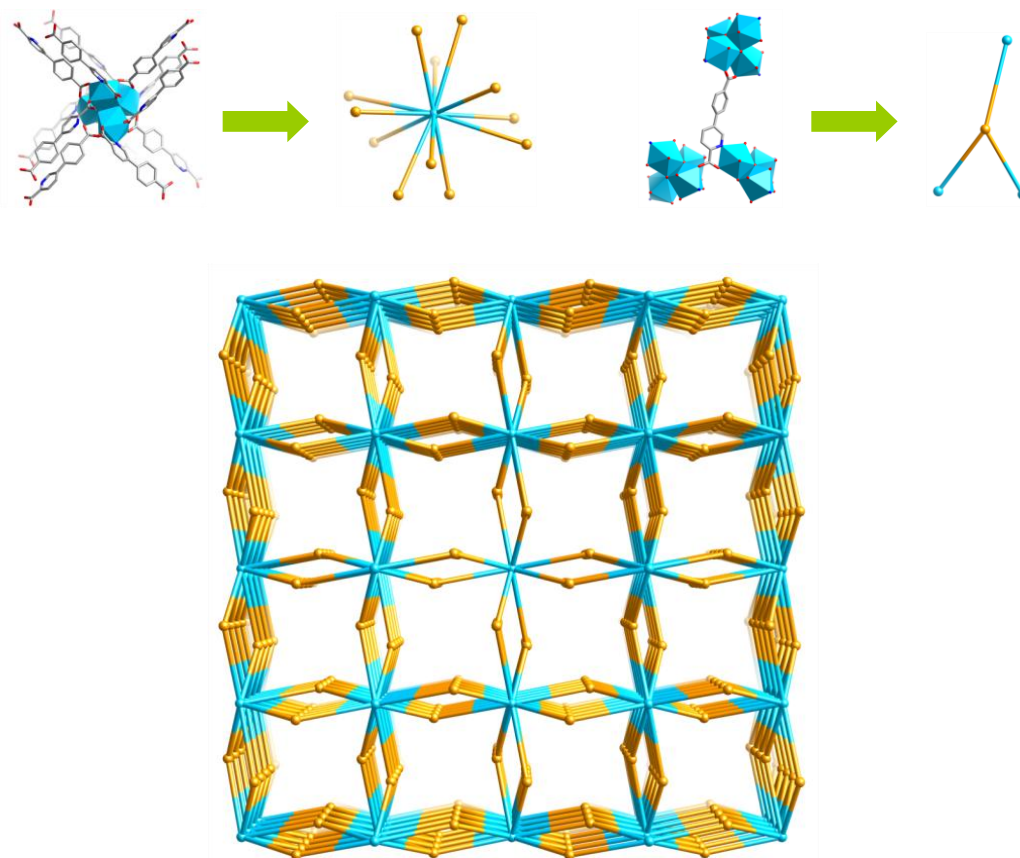

**Fig. S4** Schematic representation of the (3,12)-connected  $(4^{20}.6^{28}.8^{18})(4^3)_4$  topology. The topological net of **1**. (Node: Tb<sub>4</sub> cluster, turquoise, 12-connected node; L ligand, light orange, 3-connected node)

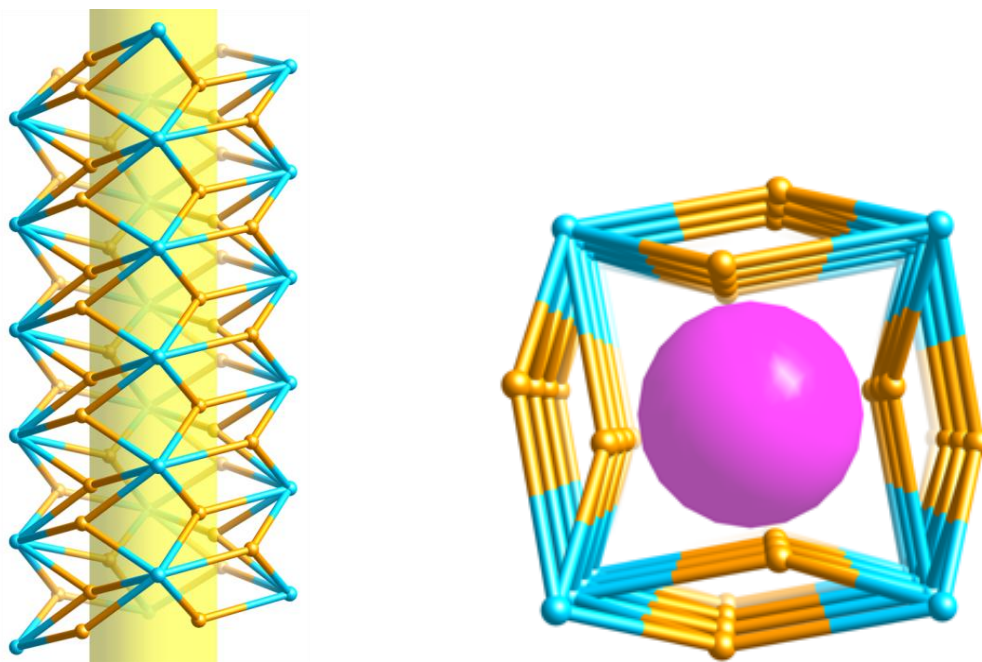

**Fig. S5** The 1D channel.

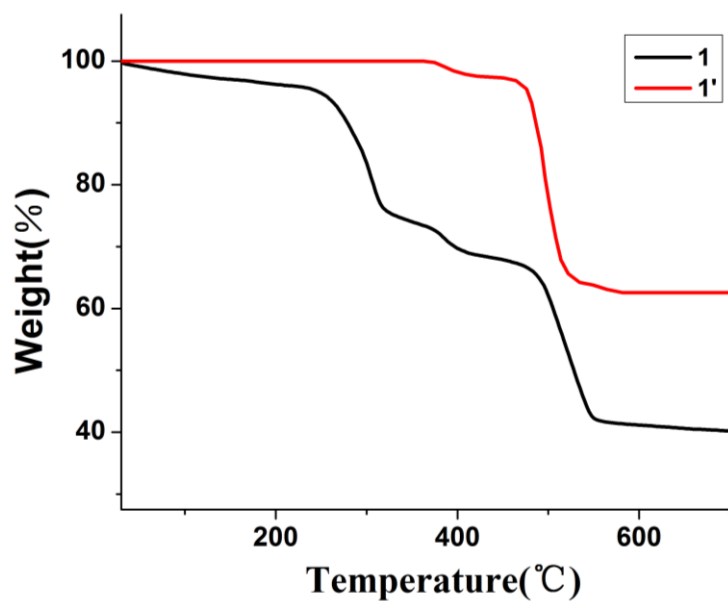

**Fig. S6** Thermogravimetric curve of **1** and **1'**. Based on the combination of SQUEEZE calculations assist with the TG and EA analyses, the tentative formula can be given as  $[\text{Tb}(\text{L})(\text{OH})] \cdot 2(\text{H}_2\text{O}) \cdot 0.5(\text{DMF})$ .

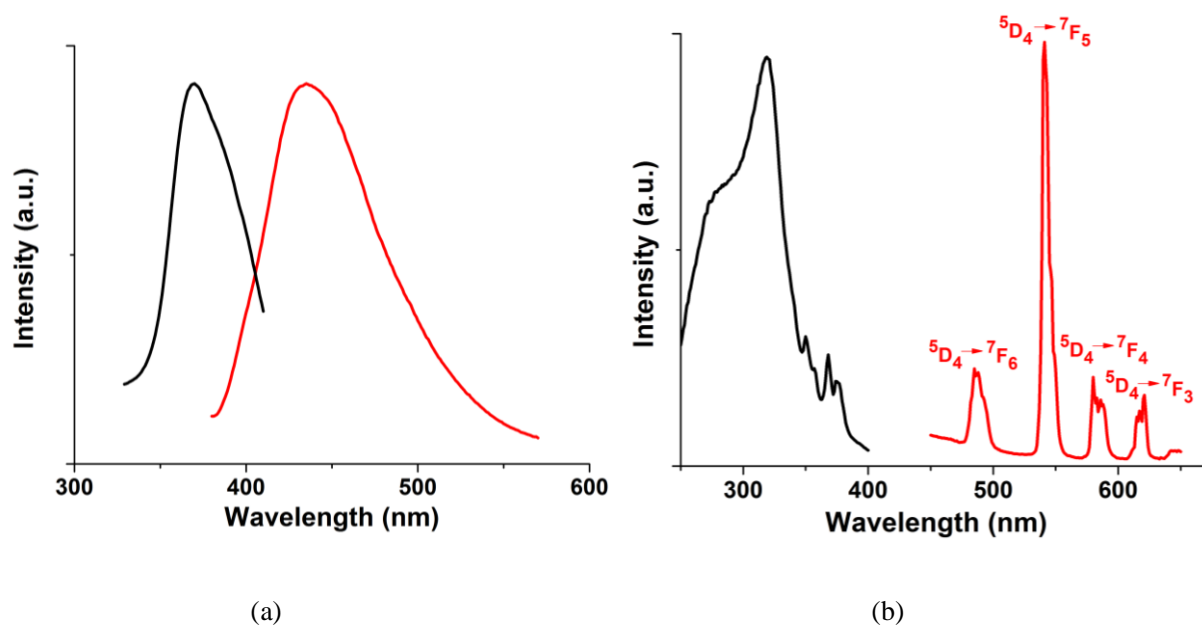

**Fig. S7** Solid-state excitation and emission spectra for  $\text{H}_2\text{L}$  (a) and **1'** (b) at room temperature.

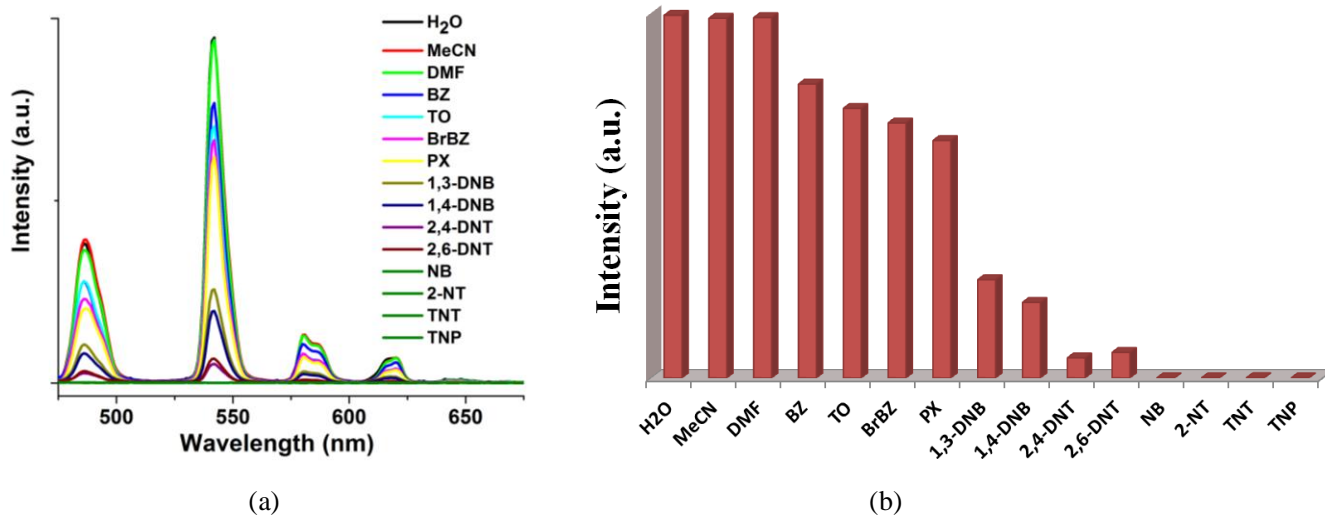

**Fig. S8** The emission spectra (a) and the fluorescent intensity (b) for **1'** dispersed in H<sub>2</sub>O, MeCN, DMF, BZ, TO, BrBZ, PX, and 1 mM or saturated aqueous solutions of eight different analytes at room temperature.

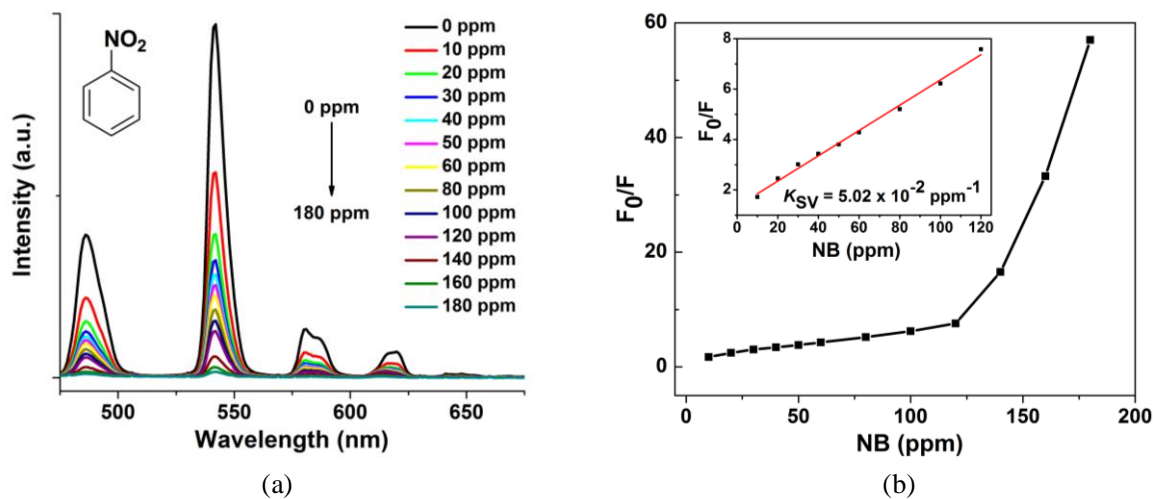

**Fig. S9** (a) Fluorescence titration of **1'** dispersed in aqueous solution by gradual addition of NB.

(b) Stern-Volmer plot of  $F_0/F$  vs. NB concentration in aqueous solution for **1'**.

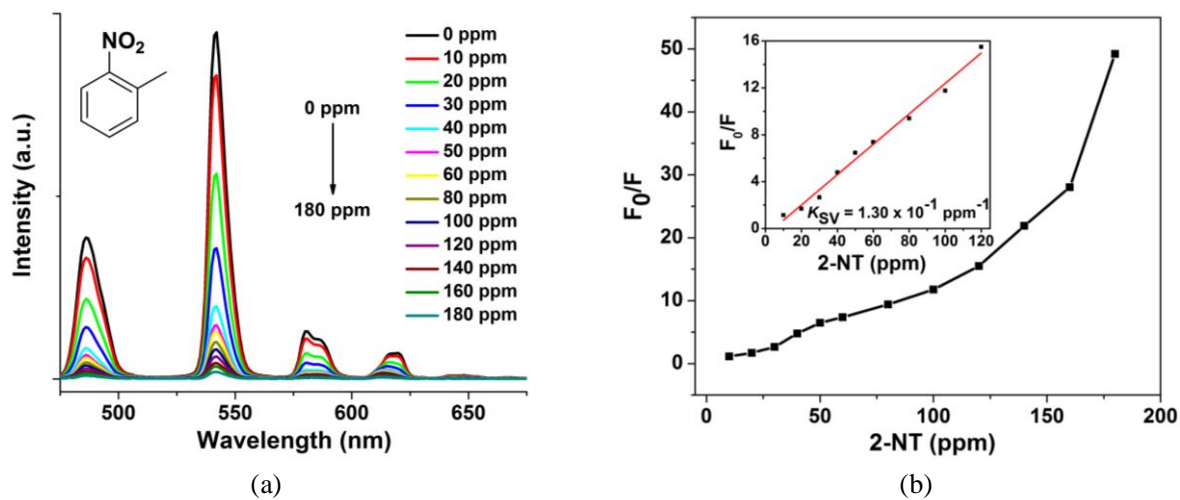

**Fig. S10** (a) Fluorescence titration of **1'** dispersed in aqueous solution by gradual addition of 2-NT.

(b) Stern-Volmer plot of  $F_0/F$  vs. 2-NT concentration in aqueous solution for **1'**.

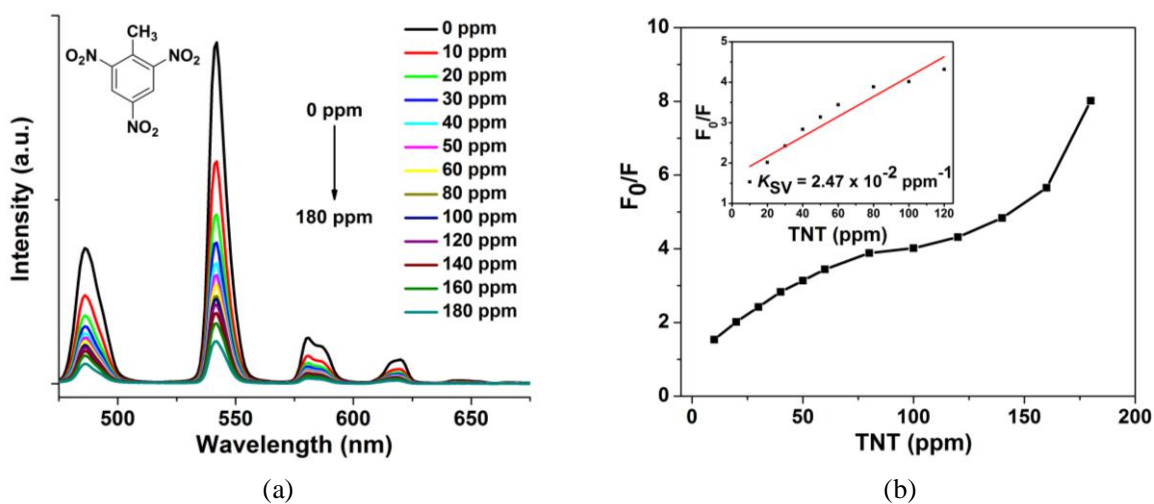

**Fig. S11** (a) Fluorescence titration of **1'** dispersed in aqueous solution by gradual addition of TNT.

(b) Stern-Volmer plot of  $F_0/F$  vs. TNT concentration in aqueous solution for **1'**.

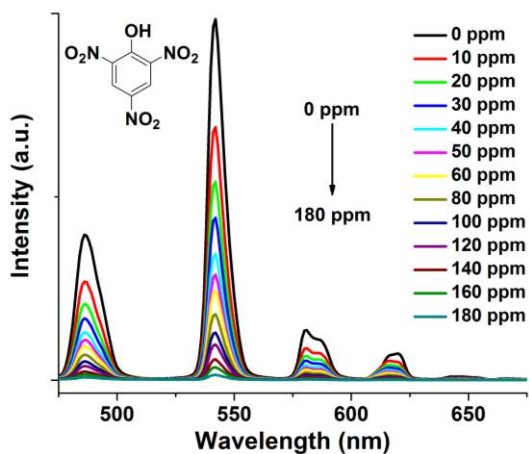

(a)

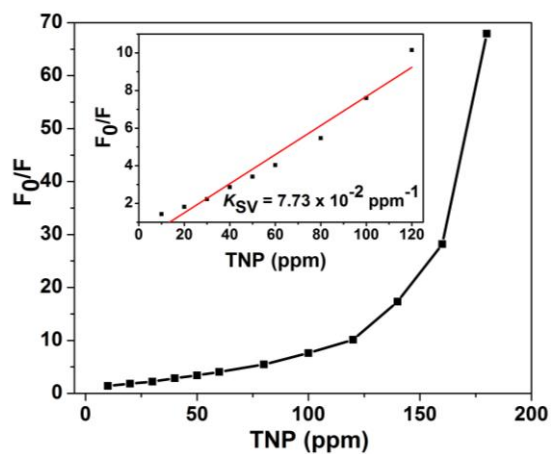

(b)

**Fig. S12** (a) Fluorescence titration of **1'** dispersed in aqueous solution by gradual addition of TNP.

(b) Stern-Volmer plot of  $F_0/F$  vs. TNP concentration in aqueous solution for **1'**.

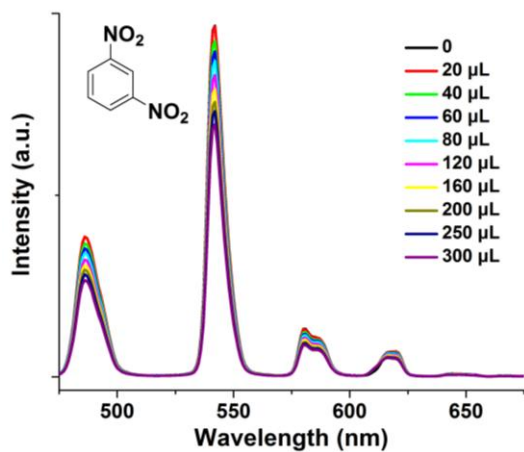

(a)

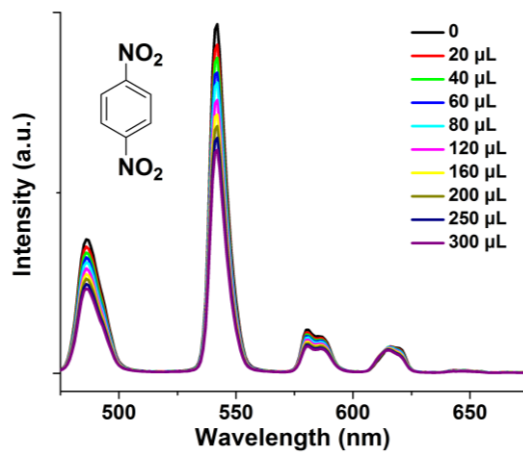

(b)

**Fig. S13** Fluorescence titration of **1'** dispersed in aqueous solution by gradual addition of saturated aqueous solutions of

1,3-DNB (a) and 1,4-DNB (b).



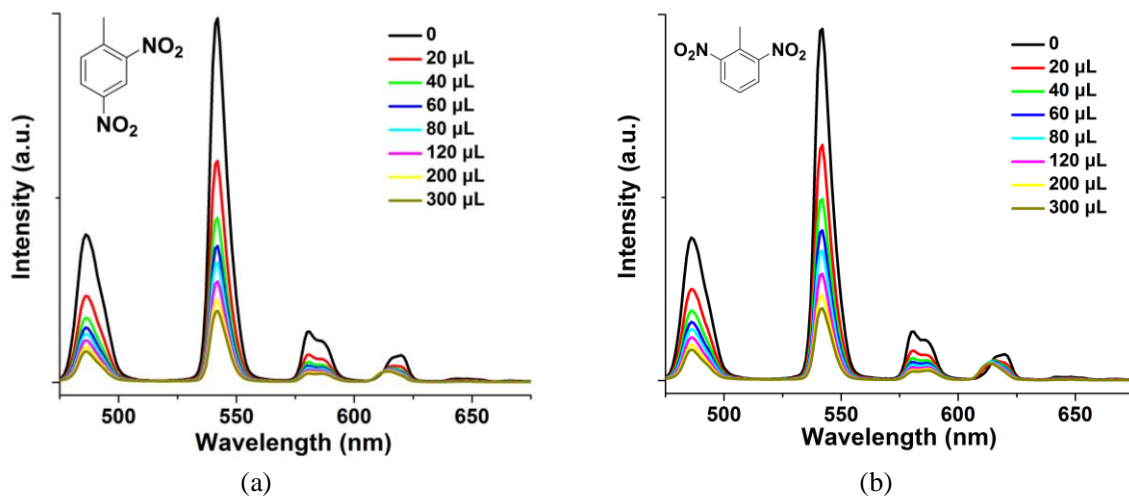

**Fig. S14** Fluorescence titration of **1'** dispersed in aqueous solution by gradual addition of saturated aqueous solutions of 2,4-DNT (a) and 2,6-DNT (b).

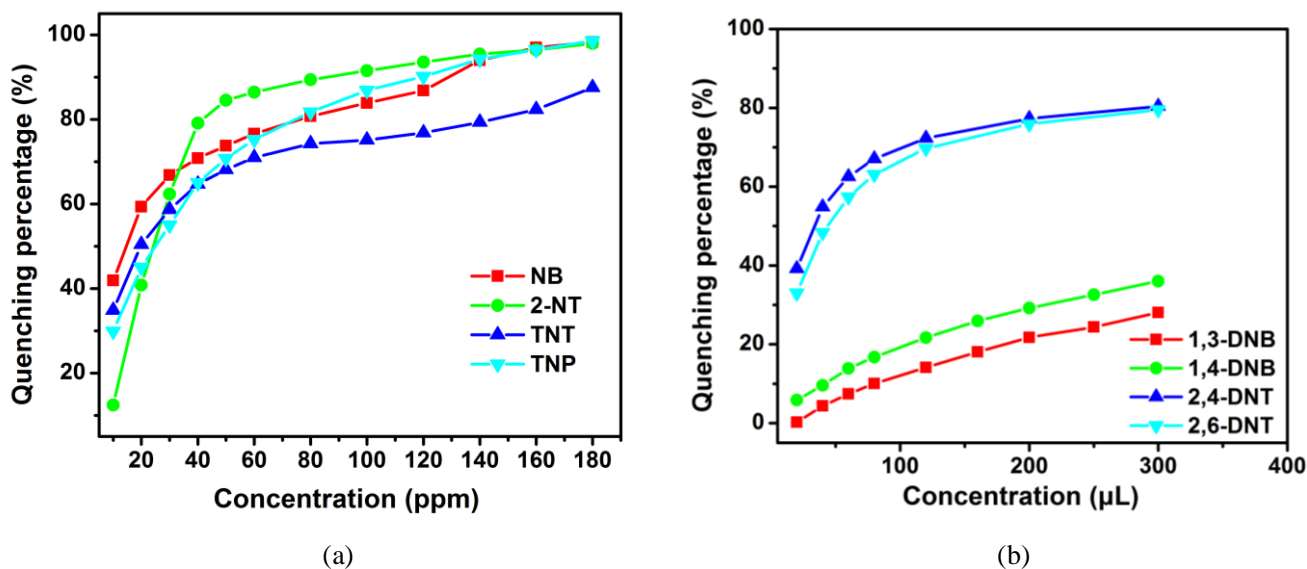

**Fig. S15** (a) Plot of quenching efficiency of **1'** dispersed in aqueous solutions at different concentrations of NB, 2-NT, TNT, and TNP. (b) Plot of quenching efficiency of **1'** dispersed in aqueous solutions upon incremental addition of saturated aqueous solutions of 1,3-DNB, 1,4-DNB, 2,4-DNT, and 2,6-DNT.

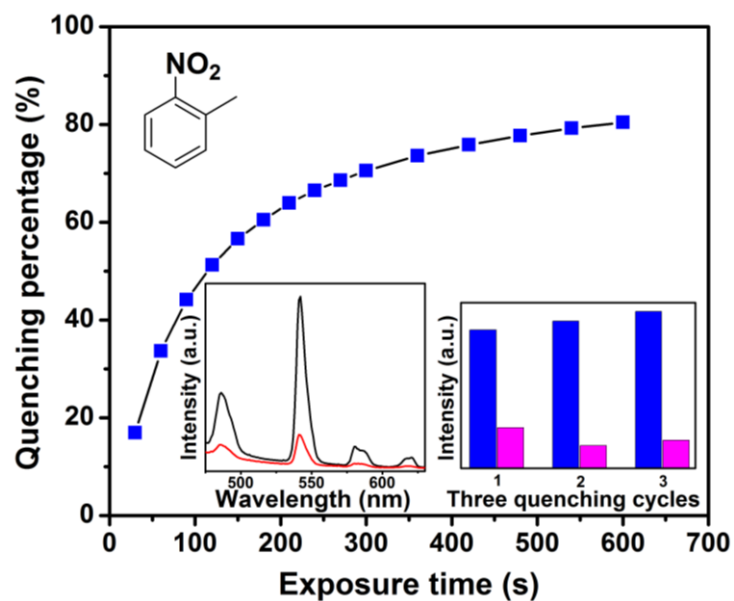

**Fig. S16** The time-dependent fluorescence quenching upon exposure to 2-NT vapor. Insets: (left) corresponding emission spectra before and after exposure of **1'** to the 2-NT vapor for ten minutes; (right) results for three continuous quenching cycles.

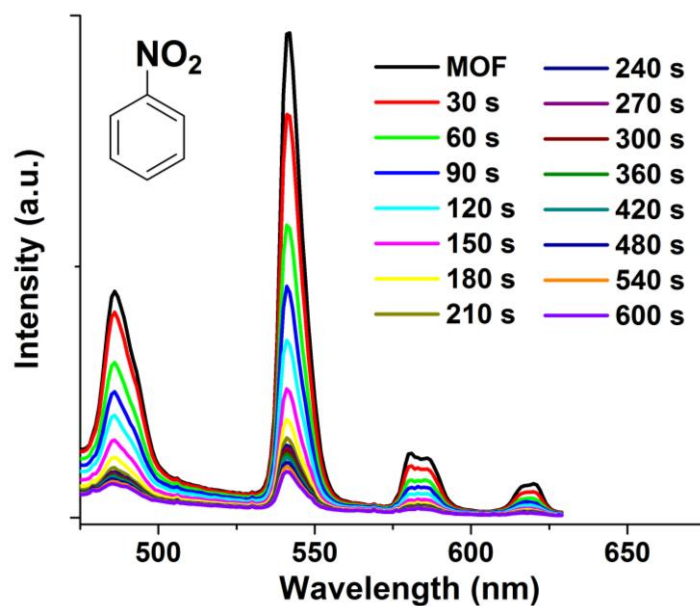

**Fig. S17** The time-dependent emission spectra of **1'** upon exposure to NB vapor.

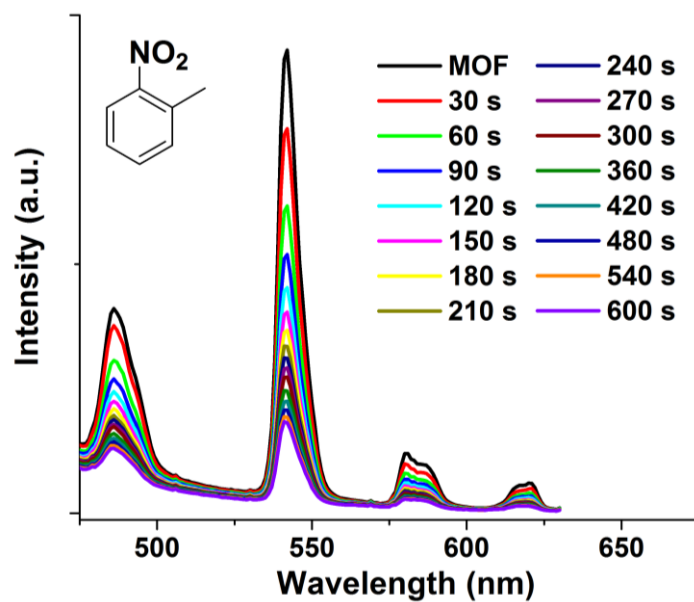

**Fig. S18** The time-dependent emission spectra of **1'** upon exposure to 2-NT vapor.

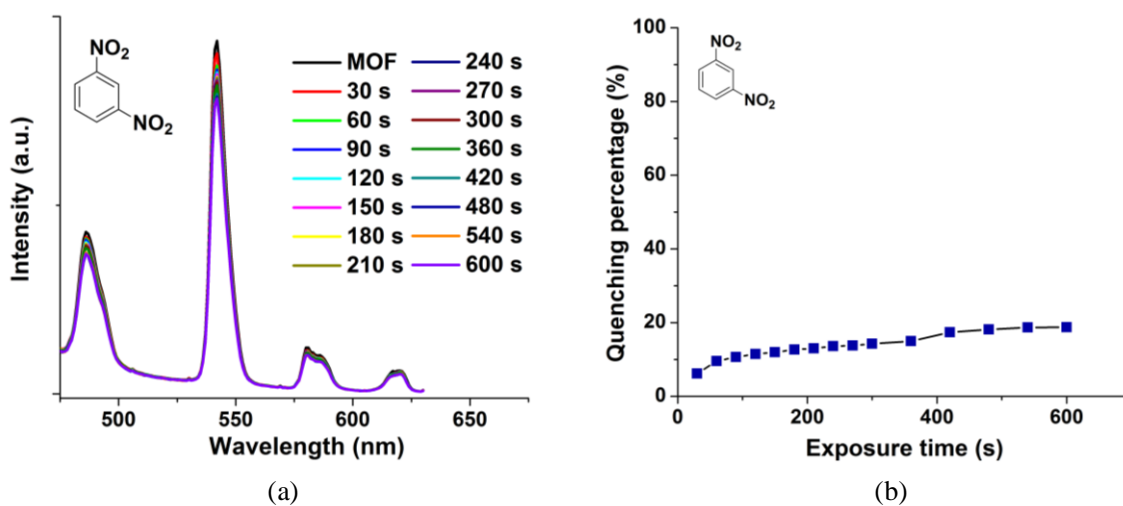

**Fig. S19** The time-dependent emission spectra (a) and fluorescence quenching (b) of **1'** upon exposure to 1,3-DNB vapor.

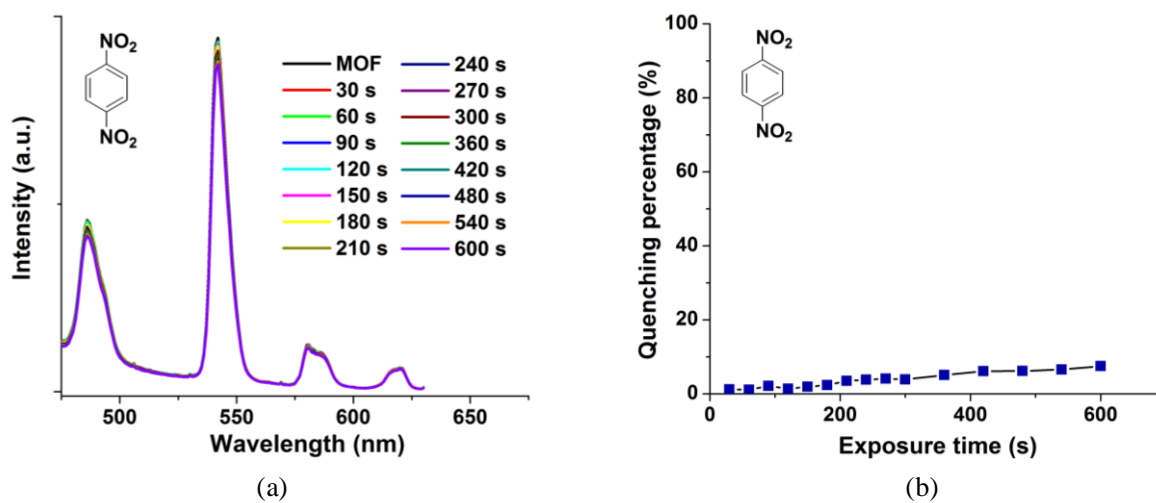

**Fig. S20** The time-dependent emission spectra (a) and fluorescence quenching (b) of **1'** upon exposure to 1,4-DNB vapor.

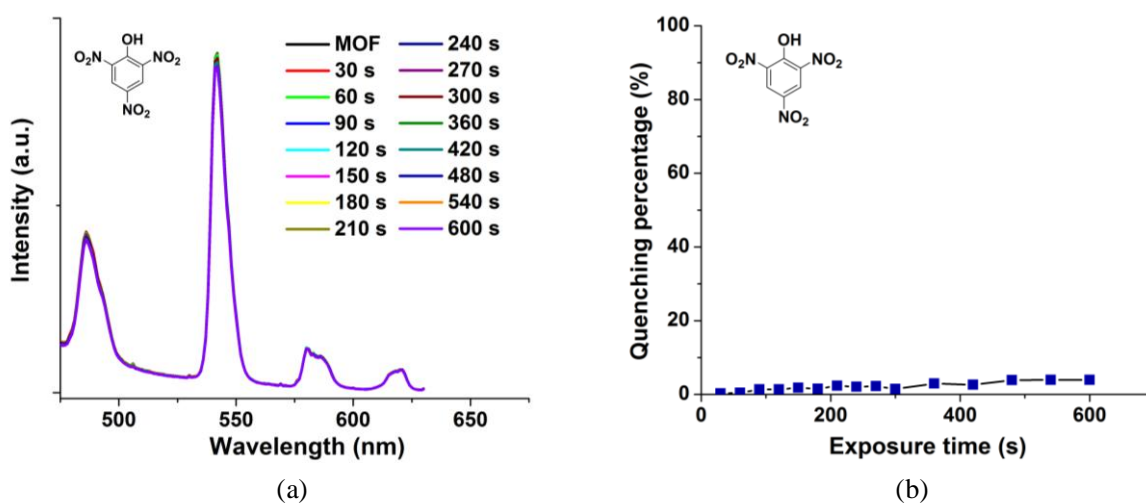

**Fig. S21** The time-dependent emission spectra (a) and fluorescence quenching (b) of **1'** upon exposure to TNP vapor.

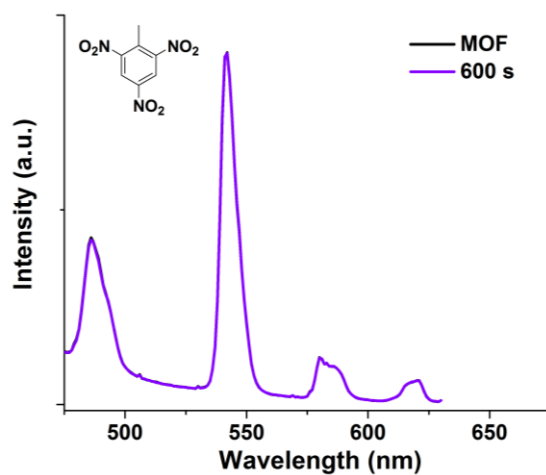

**Fig. S22** The time-dependent emission spectra of **1'** upon exposure to TNT vapor.

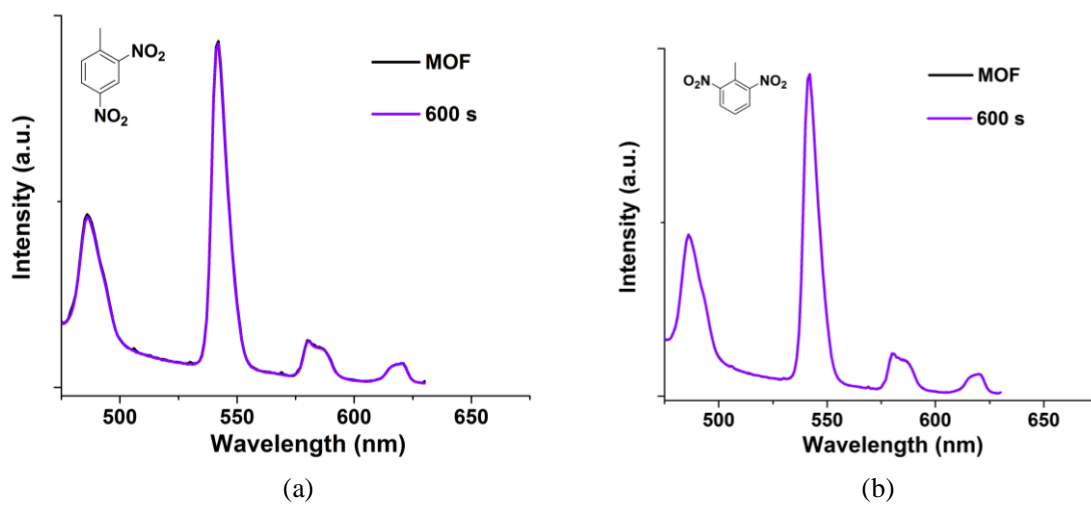

**Fig. S23** The time-dependent emission spectra of **1'** upon exposure to 2,4-DNT (a) and 2,6-DNT (b) vapor.

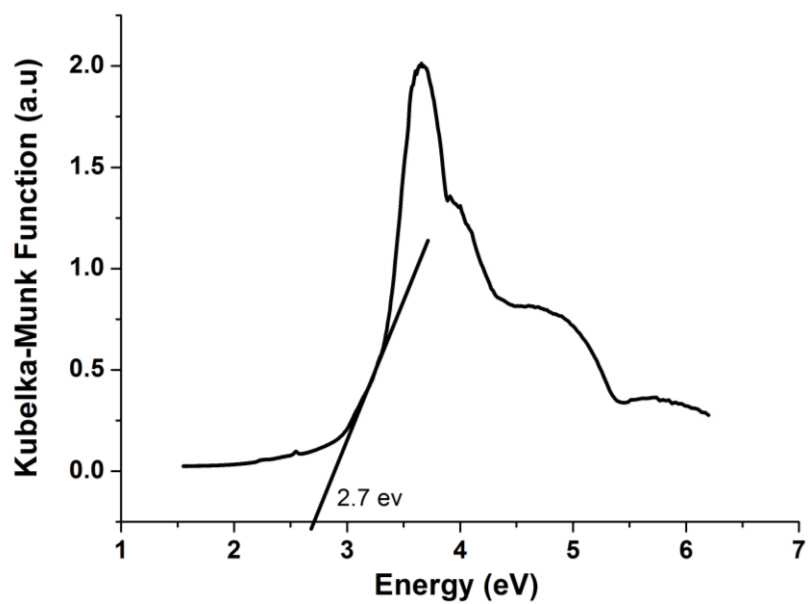

Fig. S24 The band like diffuse reflectance spectrum of a solid sample of **1'**.

The optical band gap is estimated to be  $\sim 2.7$  eV.

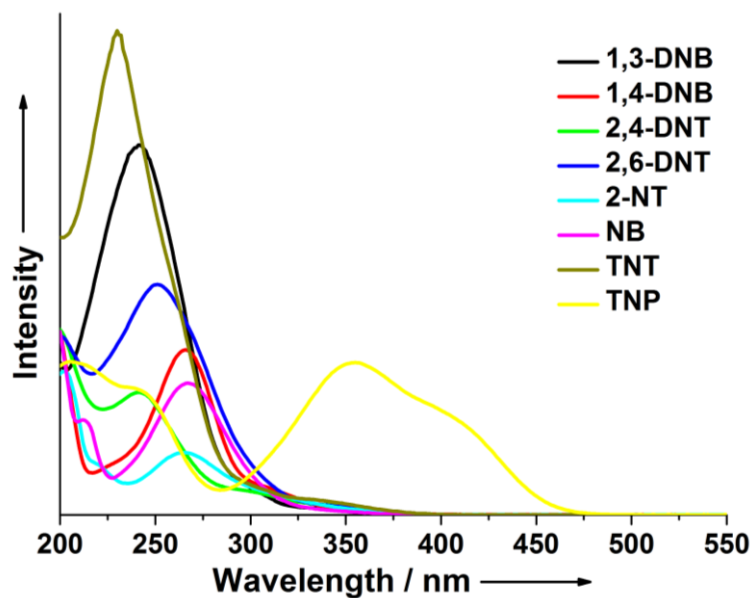

Fig. S25 The absorption spectrum of the selected analytes in water.

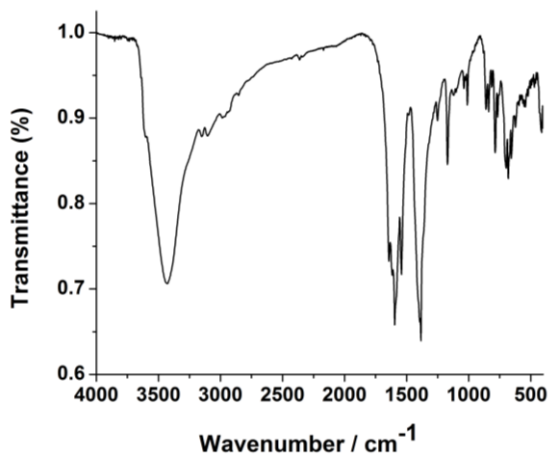

(a)

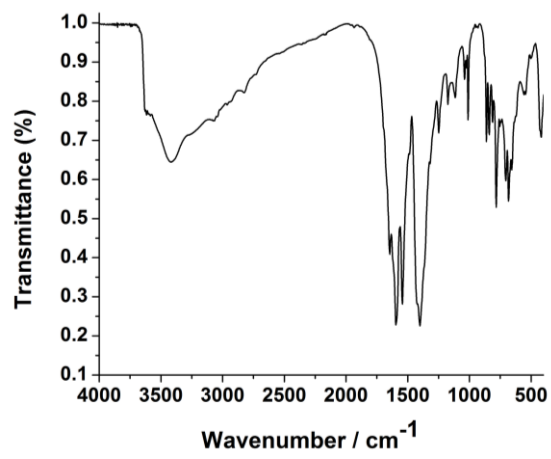

(b)

Fig. S26 IR spectrum of **1** (a) and **1'** (b).

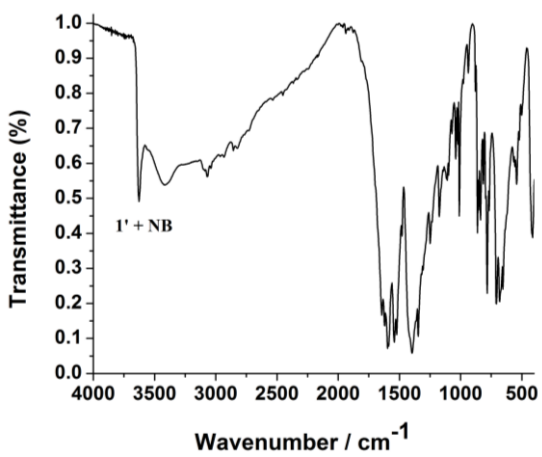

(a)

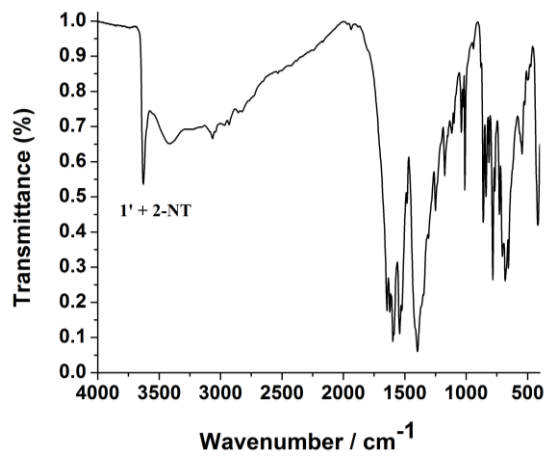

(b)

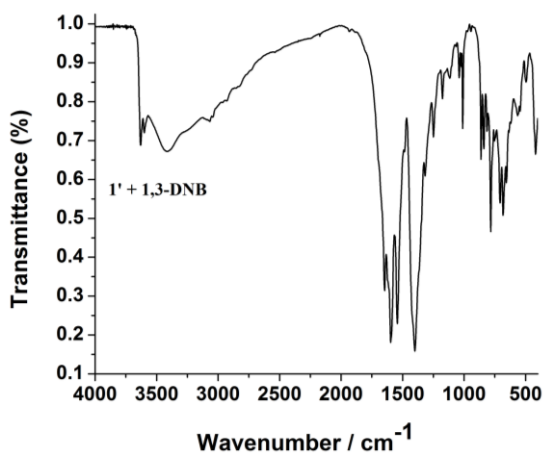

(c)

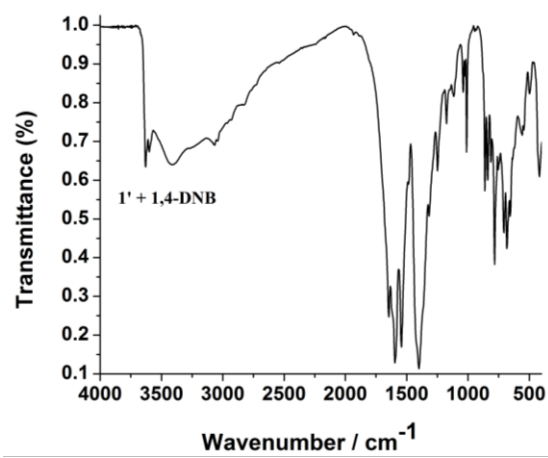

(d)

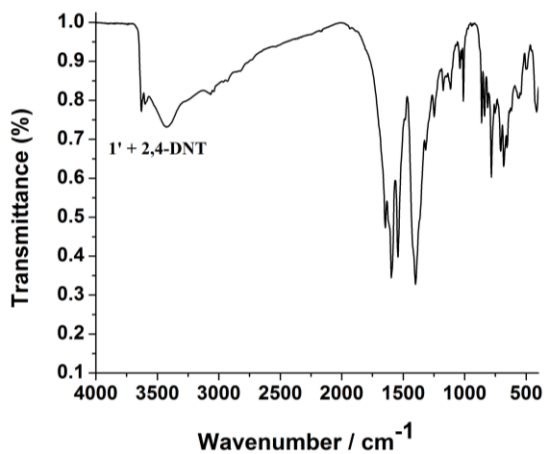

(e)

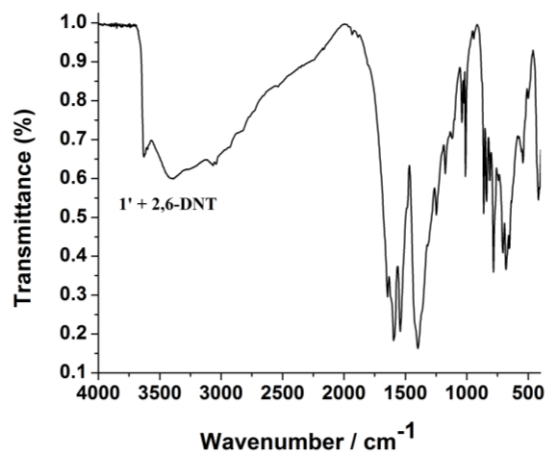

(f)

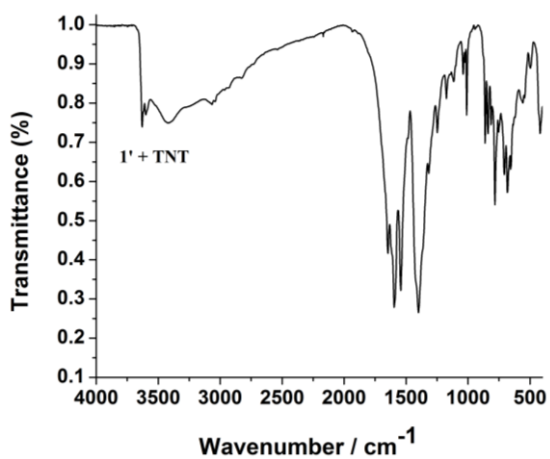

(g)

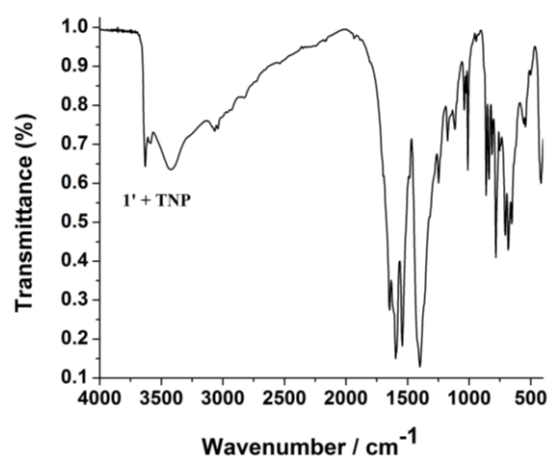

(h)

**Fig. S27** IR spectrum of  $1'$  obtained after immersing in 1 mM or saturated aqueous solutions of the selected analytes for three days. The emerging absorption peaks in the range of 1350-1650  $\text{cm}^{-1}$ , indicate a synergistic effect between nitro of nitroaromatic explosives and  $\text{COO}^-$  group of  $\text{H}_2\text{L}$  ligands.



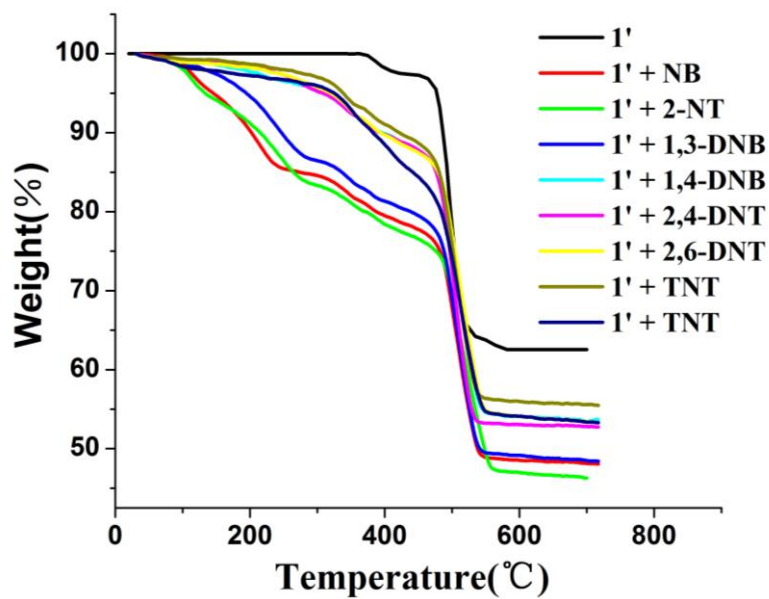

**Fig. S28** Thermogravimetric curve of **1'** obtained after immersing in 1 mM or saturated aqueous solutions of the selected analytes for three days. The eight TGA curves of **1'** display a gradual weight loss of about 10% ~ 30% up to 450 °C, which is attributed to the removal of water and nitroaromatic explosives (**Fig. S28** in ESI†).

**Table S1.** Crystallographic data and structure refinement detail for complex **1**.

| Complexes                                 | <b>1</b>                                          |
|-------------------------------------------|---------------------------------------------------|
| Formula                                   | C <sub>13</sub> H <sub>8</sub> NO <sub>5</sub> Tb |
| Formula weight                            | 417.12                                            |
| Crystal system                            | Tetragonal                                        |
| Space group                               | <i>I4(1)/a</i>                                    |
| a (Å)                                     | 30.2710(4)                                        |
| b (Å)                                     | 30.2710(4)                                        |
| c (Å)                                     | 8.2855(3)                                         |
| α(°)                                      | 90                                                |
| β(°)                                      | 90                                                |
| γ(°)                                      | 90                                                |
| V (Å <sup>3</sup> )                       | 7592.3(3)                                         |
| Z                                         | 16                                                |
| D <sub>c</sub> (g/cm <sup>3</sup> )       | 1.460                                             |
| Abs coeff/mm <sup>-1</sup>                | 3.738                                             |
| F(000)                                    | 3168                                              |
| θ range for data collection (°)           | 3.01/ 25.50                                       |
| Data/restraints/parameters                | 3519/ 0 /181                                      |
| GOF                                       | 1.079                                             |
| Flack parameter                           | None                                              |
| R <sub>1</sub> = [I > 2σ(I)] <sup>a</sup> | 0.0253                                            |
| wR <sub>2</sub> (all data)                | 0.0593                                            |

$$R = [\sum ||F_0| - |F_d|| / \sum |F_0|], R_w = \sum_w [|F_0^2 - F_c^2| / \sum_w (|F_w|^2)]^{1/2}$$

**Table S2.** Selected bond lengths (Å) and angles (°) for complex **1**.

| Complex 1           |            |                     |            |
|---------------------|------------|---------------------|------------|
| Tb(1)-O(5)          | 2.347(3)   | Tb(1)-O(3)#3        | 2.375(3)   |
| Tb(1)-O(4)#1        | 2.348(3)   | Tb(1)-O(5)#4        | 2.383(3)   |
| Tb(1)-O(1)          | 2.360(3)   | Tb(1)-O(2)#5        | 2.429(3)   |
| Tb(1)-O(5)#2        | 2.364(3)   | Tb(1)-N(1)          | 2.576(3)   |
| O(5)-Tb(1)-O(4)#1   | 94.45(10)  | O(3)#3-Tb(1)-O(5)#4 | 80.00(10)  |
| O(5)-Tb(1)-O(1)     | 108.28(9)  | O(5)-Tb(1)-O(2)#5   | 69.05(9)   |
| O(4)#1-Tb(1)-O(1)   | 144.95(10) | O(4)#1-Tb(1)-O(2)#5 | 78.15(10)  |
| O(5)-Tb(1)-O(5)#2   | 69.57(11)  | O(1)-Tb(1)-O(2)#5   | 85.37(9)   |
| O(4)#1-Tb(1)-O(5)#2 | 142.67(9)  | O(5)#2-Tb(1)-O(2)#5 | 122.53(9)  |
| O(1)-Tb(1)-O(5)#2   | 71.85(9)   | O(3)#3-Tb(1)-O(2)#5 | 148.48(10) |
| O(5)-Tb(1)-O(3)#3   | 142.30(10) | O(5)#4-Tb(1)-O(2)#5 | 126.97(9)  |
| O(4)#1-Tb(1)-O(3)#3 | 97.75(11)  | O(5)-Tb(1)-N(1)     | 139.24(10) |
| O(1)-Tb(1)-O(3)#3   | 80.53(10)  | O(4)#1-Tb(1)-N(1)   | 80.30(10)  |
| O(5)#2-Tb(1)-O(3)#3 | 79.38(10)  | O(1)-Tb(1)-N(1)     | 65.01(10)  |
| O(5)-Tb(1)-O(5)#4   | 69.51(10)  | O(5)#2-Tb(1)-N(1)   | 133.83(10) |
| O(4)#1-Tb(1)-O(5)#4 | 73.60(9)   | O(3)#3-Tb(1)-N(1)   | 78.16(11)  |
| O(1)-Tb(1)-O(5)#4   | 138.94(9)  | O(5)#4-Tb(1)-N(1)   | 143.11(10) |
| O(5)#2-Tb(1)-O(5)#4 | 69.23(10)  | O(2)#5-Tb(1)-N(1)   | 70.32(10)  |

Symmetry transformations used to generate equivalent atoms for **1**:

#1 -x, -y+2, -z; #2 -x, -y+3/2, z; #3 -y+5/4, x+3/4, z-1/4; #4 y-3/4, -x+3/4, -z-1/4; #5 -y+3/4, x+3/4, -z+3/4.

**Table S3.** Saturated Vapor Pressure for each of the analytes at room temperature (25 °C).

| Analytes                                    | Vapor Pressure<br>(in mmHg) | Reduction Potential<br>(in V vs SCE) |
|---------------------------------------------|-----------------------------|--------------------------------------|
| Nitrobenzene (NB) <sup>1</sup>              | 0.2416                      | -1.15                                |
| 2-Nitrotoluene (2-NT) <sup>1</sup>          | 0.1602                      | -1.2                                 |
| 1,3-Dinitrobenzene(1,3-DNB) <sup>2</sup>    | $8.82 \times 10^{-4}$       | -0.9                                 |
| 1,4-Dinitrobenzene (1,4-DNB) <sup>1</sup>   | $2.406 \times 10^{-5}$      | -0.7                                 |
| 2,4-dinitrotoluene (2,4-DNT) <sup>1</sup>   | $1.44 \times 10^{-4}$       | -1.0                                 |
| 2,6-dinitrotoluene (2,6-DNT) <sup>1,3</sup> | $5.61 \times 10^{-4}$       | -1.0                                 |
| 2,4,6-trinitrotoluene (TNT) <sup>1,4</sup>  | $8.02 \times 10^{-6}$       | -0.7                                 |
| 2,4,6-trinitrophenol (TNP) <sup>4</sup>     | $5.8 \times 10^{-9}$        | -0.63                                |

1 J. S. Yang and T. M. Swager, *J. Am. Chem. Soc.*, 1998, **120**, 11864.

2 R. Hoffmann, *J. Chem. Phys.*, 1963, **39**, 1397.

3 A. J. Lan, K. H. Li, H. H. Wu, L. Z. Kong, N. Nijem, D. H. Olson, T. J. Emge, Y. J. Chabal, D. C. Langreth, M. C. Hong and J. Li, *Inorg. Chem.*, 2009, **48**, 7165.

4 J. C. Sanchez and W. C. Trogler, *J. Mater. Chem.*, 2008, **18**, 3143.

**Table S4.** Approximate sizes of the selected analytes.

| Analytes | Approximate Size (D×W×L, Å) |
|----------|-----------------------------|
| NB       | 3.4 × 6.2 × 8.6             |
| 2-NT     | 5.0 × 7.7 × 8.6             |
| 1,3-DNB  | 5.6 × 7.7 × 8.1             |
| 1,4-DNB  | 5.6 × 7.7 × 9.1             |
| 2,4-DNT  | 5.6 × 7.7 × 10.1            |
| 2,6-DNT  | 5.6 × 7.7 × 9.5             |
| TNT      | 5.6 × 7.7 × 10.2            |
| TNP      | 5.0 × 6.2 × 7.1             |

**Table S5.** HOMO and LUMO energies calculated for H<sub>2</sub>L and nitroaromatic explosives at B3LYP/6-31G\*\* level of theory.

| Analytes             | HOMO (eV) | LUMO (eV) | Band gap |
|----------------------|-----------|-----------|----------|
| H <sub>2</sub> L     | -7.02435  | -2.30916  | 4.71519  |
| NB <sup>6</sup>      | -7.5912   | -2.4283   | 5.1629   |
| 2-NT <sup>5</sup>    | -7.36454  | -2.31722  | 5.04732  |
| 1,3-DNB <sup>6</sup> | -7.9855   | -3.4311   | 4.5544   |
| 1,4-DNB <sup>5</sup> | -8.35250  | -3.49679  | 4.85571  |
| 2,4-DNT <sup>6</sup> | -7.7645   | -3.2174   | 4.5471   |
| 2,6-DNT <sup>6</sup> | -7.6448   | -3.2877   | 4.3571   |
| TNT <sup>6</sup>     | -8.2374   | -3.8978   | 4.3396   |
| TNP <sup>6</sup>     | -8.4592   | -3.4926   | 4.9666   |

5 G. Y. Wang, C. Song, D. M. Kong, W. J. Ruan, Z. Chang and Y. Li, *J. Mater. Chem. A.*, 2014, **2**, 2213.

6 S. S. Nagarkar, B. Joarder, A. K. Chaudhari, S. Mukherjee and S. K. Ghosh, *Angew. Chem., Int. Ed.*, 2013, **52**, 2881.
